# Supplementary material for: Facile synthesis of a novel WO3/Ag2MoO4 particles-on-plate staggered type II heterojunction with improved visible-light photocatalytic activity in removing environmental pollutants
Source: Royal Society of Chemistry journal article supplement (doi:10.1039/c9ra07175j), 2019-01-01
Supplement: c9ra07175j1.pdf [file c9ra07175j1.pdf]

## Electronic Supplementary Information

Huanli Wang<sup>\*, a, b</sup>, Yafei Wang<sup>a</sup>, Ailing Xu<sup>a</sup>, Qipeng Yang<sup>a</sup>, Fujun Tao<sup>c</sup>, Mingliang Ma<sup>d</sup>,  
Zhiwen Song<sup>\*,a</sup> and Xiaobo Chen<sup>\*,b</sup>

<sup>a</sup> School of Environmental and Municipal Engineering, Qingdao University of Technology,  
11 Fushun Rd., Qingdao 266033, China.

<sup>b</sup> Department of Chemistry, College of Arts and Sciences, University of Missouri - Kansas  
City, USA.

<sup>c</sup> College of Ocean Science and Engineering, Shanghai Maritime University, Shanghai,  
201306, P. R. China.

<sup>d</sup> Research Institute of Functional Materials, School of Civil Engineering, Qingdao  
University of Technology, 11 Fushun Road, Qingdao 266033, China.

Email: Huanli [Wang-whl\\_r@126.com](mailto:Wang-whl_r@126.com); Zhiwen Song-[songzhiwen@qut.edu.cn](mailto:songzhiwen@qut.edu.cn); Xiaobo Chen-  
[chenxiaobo@umkc.edu](mailto:chenxiaobo@umkc.edu)

\* Corresponding author

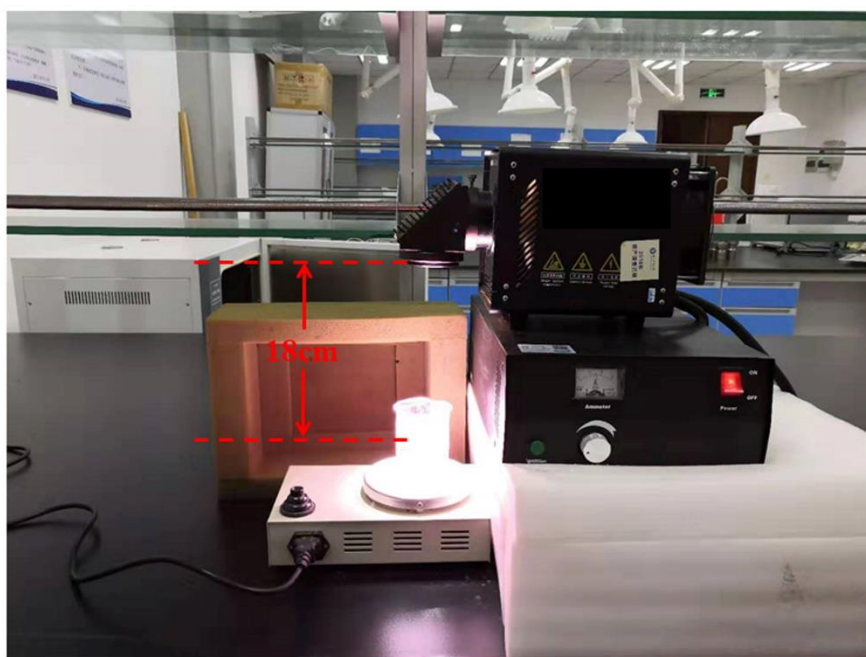

Figure S1 The reaction setup (the distance between the light and the solution is around 18cm)

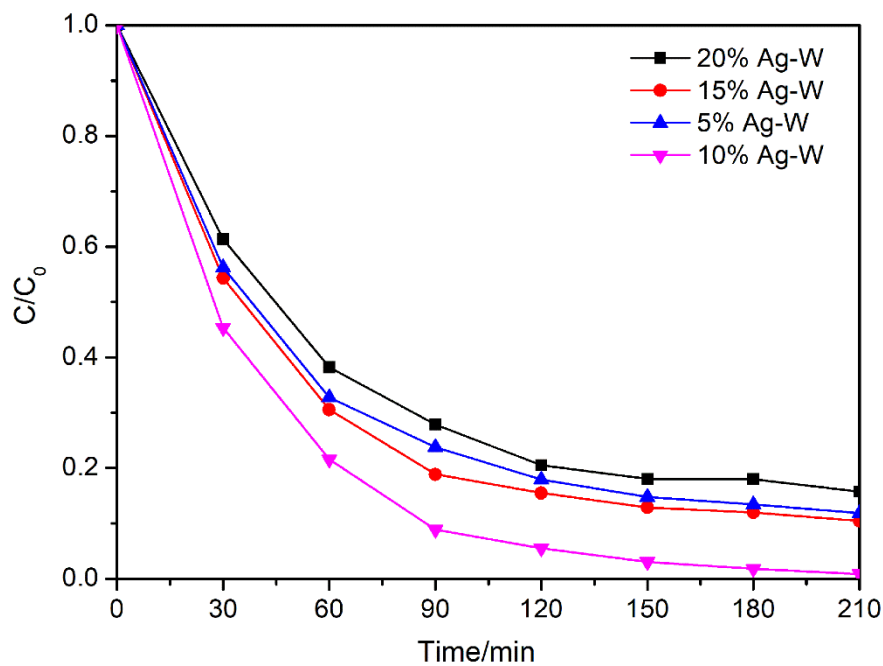

Figure S2 Degradation curves of tetracycline hydrochloride (TC) under the visible light irradiation ( $\lambda > 420$  nm) over Ag-W photocatalysts with different weight ration of  $\text{Ag}_2\text{MoO}_4$

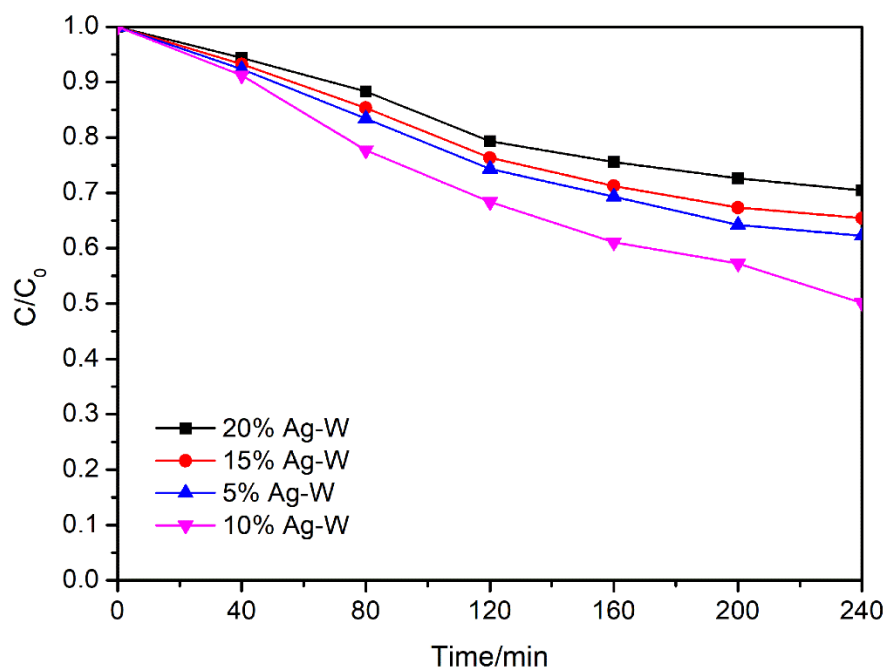

Figure S3 Degradation curves of 4-chlorophenol (4-CP) under the visible light irradiation ( $\lambda > 420$  nm) over Ag-W photocatalysts with different weight ration of  $\text{Ag}_2\text{MoO}_4$

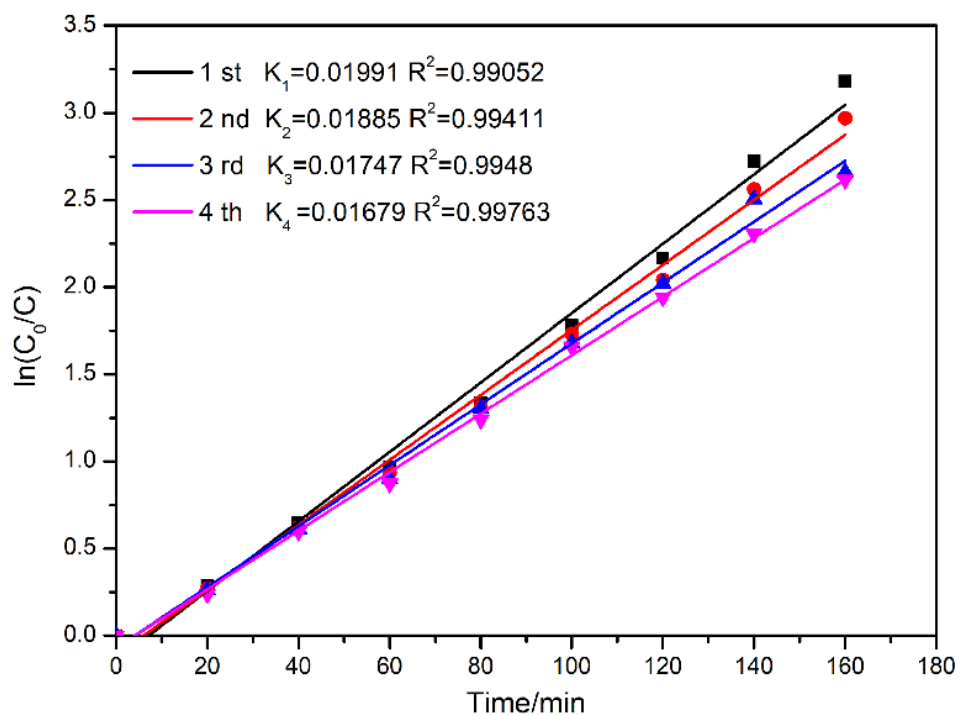

Figure S4 Rate constants ( $k$ ) of cycling runs in photocatalytic photodegradation of RhB (10 mg/L, 100 mL) over 10%Ag-W heterojunction (100 mg) under visible light ( $\lambda > 420$  nm)

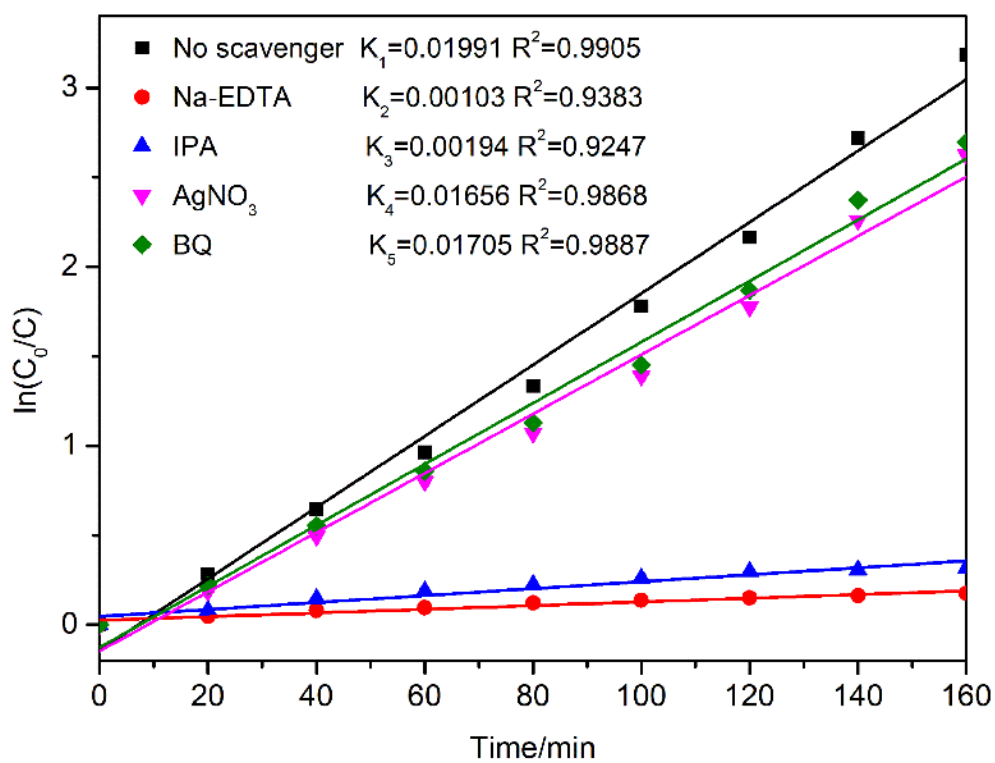

Figure S5 Rate constants ( $k$ ) of the degradation of RhB (10 mg/L, 100 mL) efficiencies over 10% Ag-W heterojunction with different scavengers
